# Supplementary material for: Shaped platinum nanoparticles directly synthesized inside mesoporous silica supports
Source: Royal Society of Chemistry journal article supplement (doi:10.1039/c4nr03951c), 2014-08-06
Supplement: c4nr03951c1.pdf [file c4nr03951c1.pdf]

# Shaped Platinum Nanoparticles Directly Synthesized Inside Mesoporous Silica Supports

Jiwhan Kim<sup>a</sup>, Youn-Sang Bae<sup>a</sup>, and Hyunjoo Lee<sup>b\*</sup>

<sup>a</sup>Department of Chemical and Biomolecular Engineering, Yonsei University, Seoul 120-749, Republic of Korea, <sup>b</sup>Department of Chemical and Biomolecular Engineering, Korea Advanced Institute of Science and Technology, Daejeon 305-701, Republic of Korea

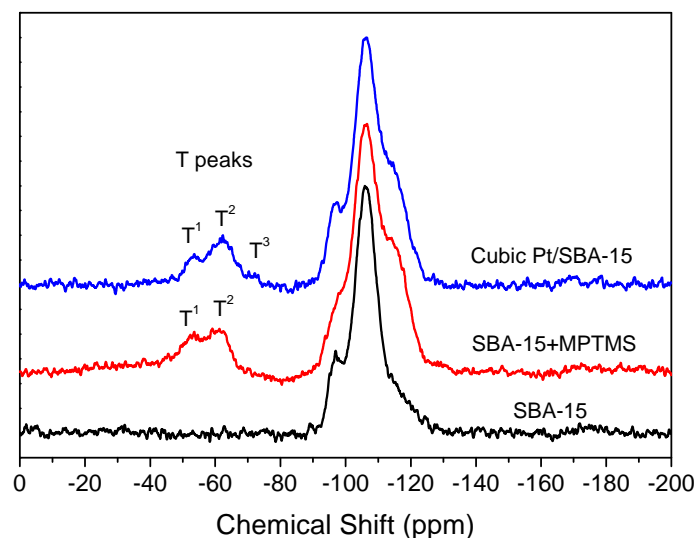

**Figure S1.** <sup>29</sup>Si CP MAS NMR results measured for bare SBA-15, SBA-15 treated with the same synthesis recipe as cubic Pt/SBA-15 except the absence of Pt precursor (SBA-15+MPTMS), cubic Pt/SBA-15. All samples were washed thoroughly before the measurements. (T<sup>m</sup> peaks:  $-\text{C}-\text{Si}-(\text{OSi})_m(\text{OH})_{3-m}$ )

\* CORRESPONDING AUTHOR: [Email] azhyun@kaist.ac.kr [Tel] +82-42-350-3922 [Fax] +82-42-350-3910

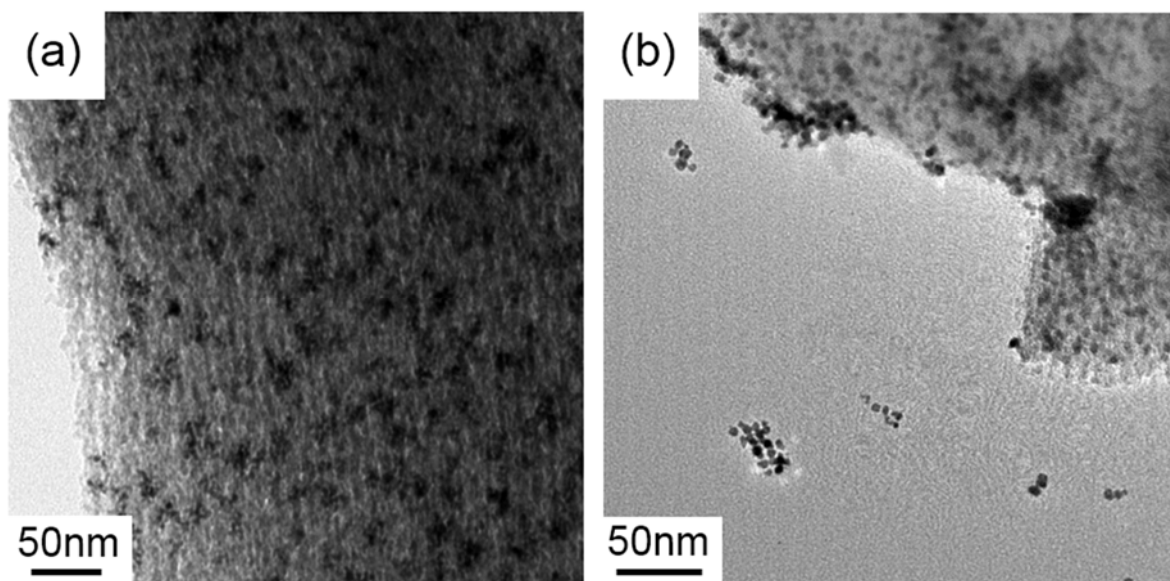

**Figure S2.** TEM images of the samples prepared with (a) APTMS+Pt precursor+SBA-15 or (b) hexanethiol+Pt precursor+SBA-15. MPTMS was not added in these cases.

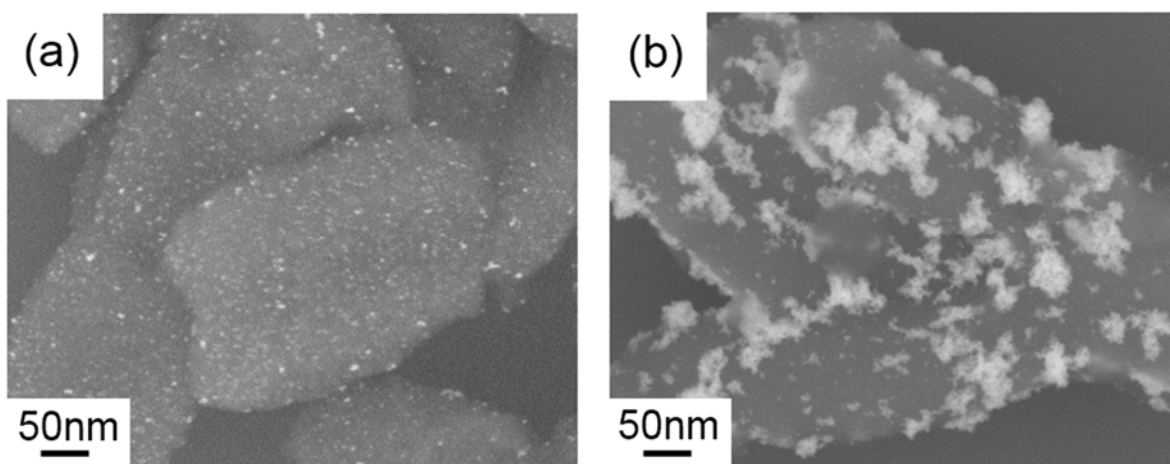

**Figure S3.** SEM images of the samples prepared using (a) porous SBA-15 after calcination and (b) as-made SBA-15 without calcination.

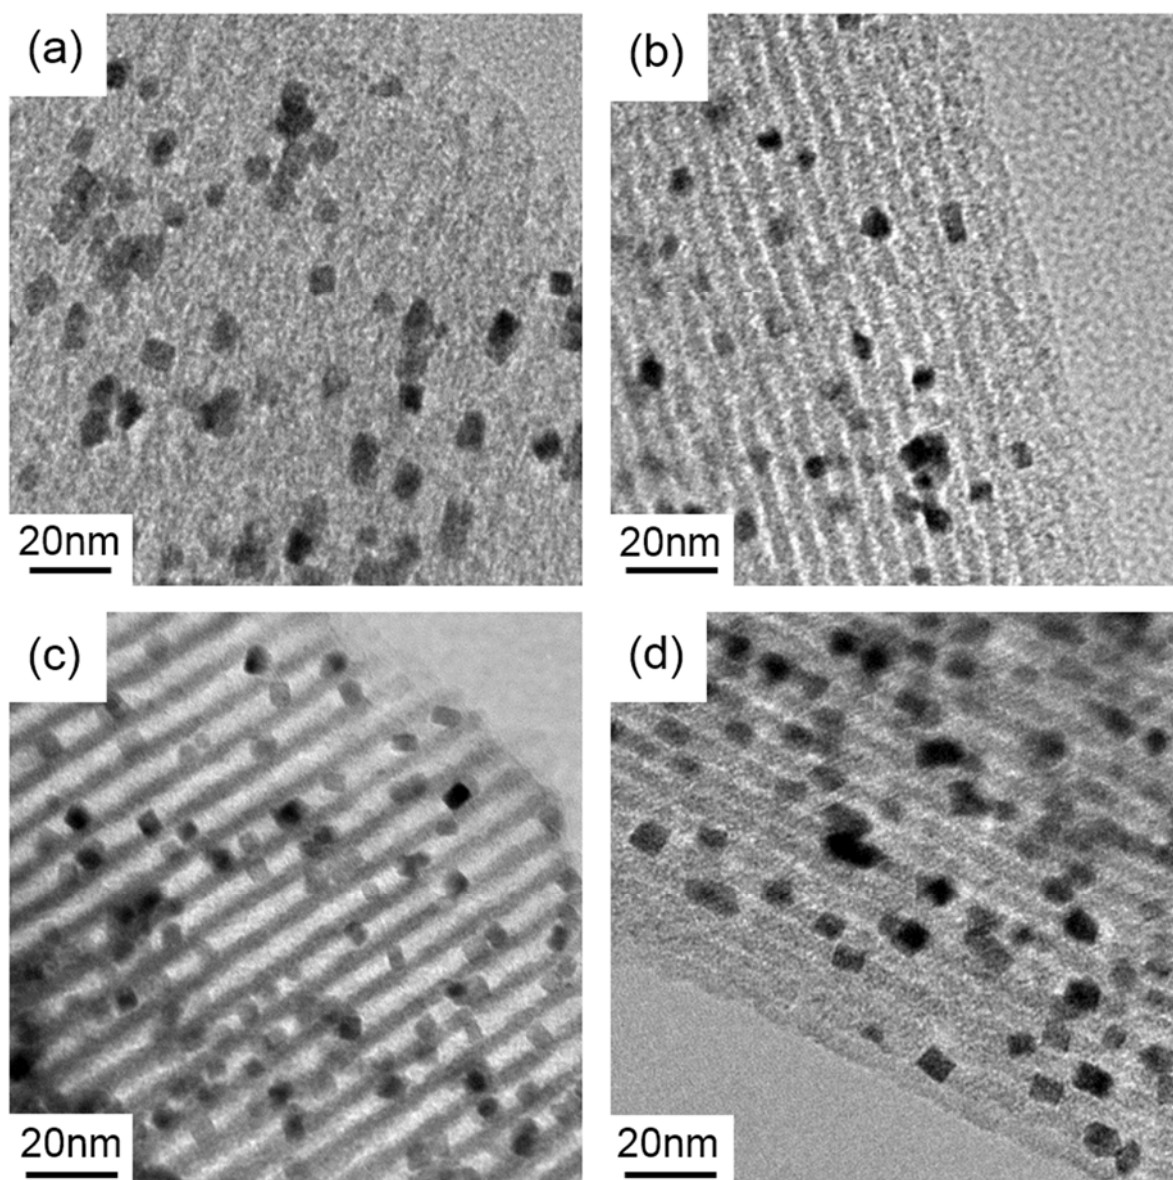

**Figure S4.** TEM images of cubic Pt/SBA-15 with different platinum contents of (a) 6.1 wt% , (b) 9.1 wt%, (c) 13.3 wt%, and (d) 17.8 wt%. The amounts of the reactants (SBA-15(mg)/Pt(acac)<sub>2</sub>(mg)/MPTMS(ml)) were (a) 50/10/4, (b) 50/15/7.5, (c) 50/25/7.5, and (d) 50/35/7.5, respectively.

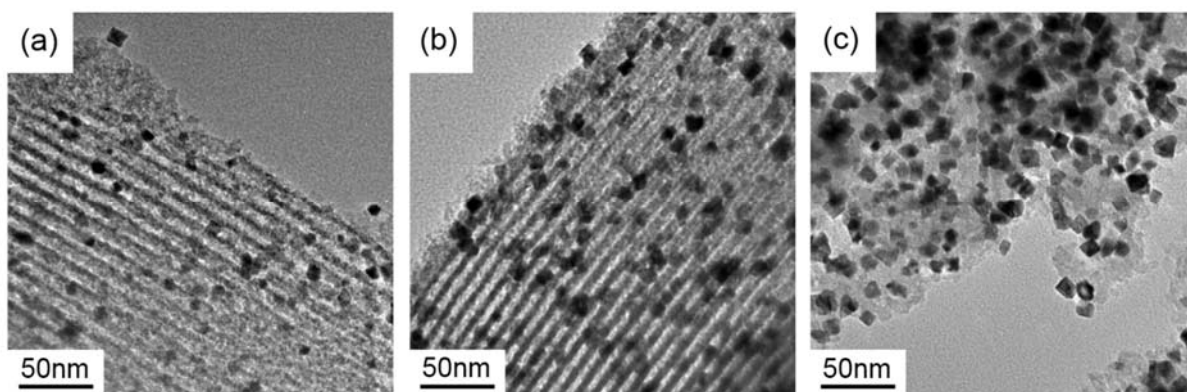

**Figure S5.** TEM images of the samples prepared with different amounts of MPTMS. The volumes of MPTMS added for the synthesis were (a) 2  $\mu\text{L}$ , (b) 3  $\mu\text{L}$  and (c) 6  $\mu\text{L}$ . SBA-15 20 mg and  $\text{Pt}(\text{acac})_2$  4 mg were used in all cases.

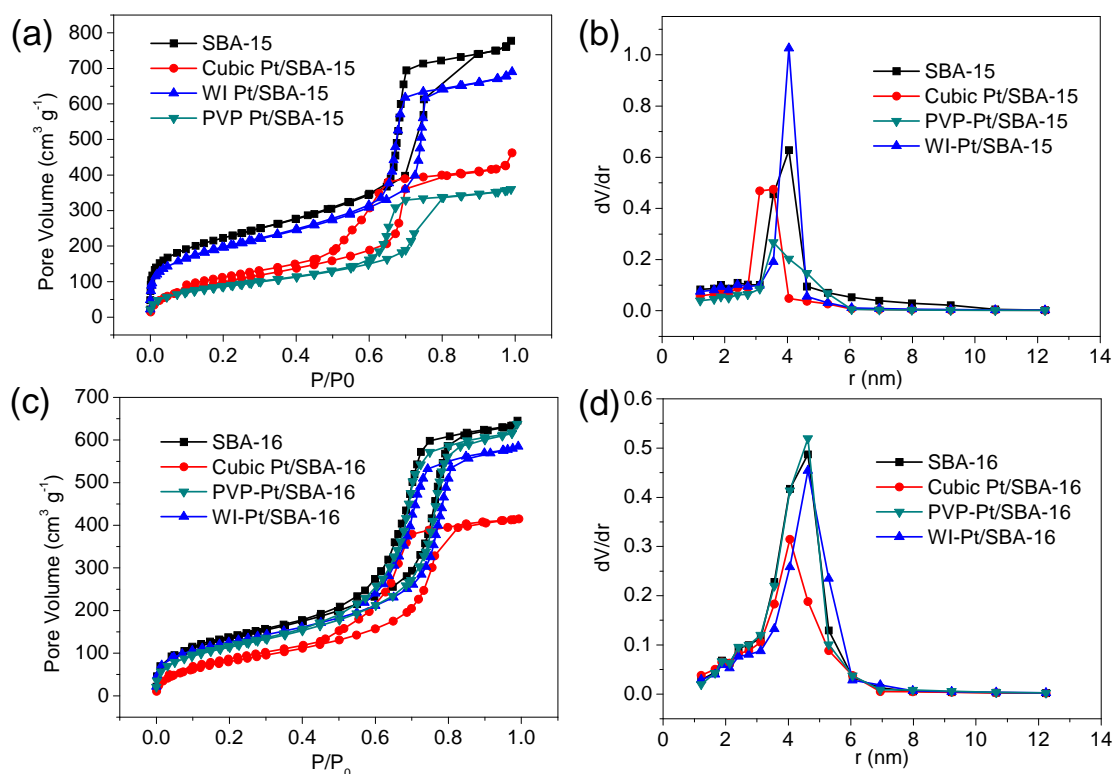

**Figure S6.** BET isotherms and pore size distributions of the samples prepared with (a), (b) SBA-15, and (c), (d) SBA-16.

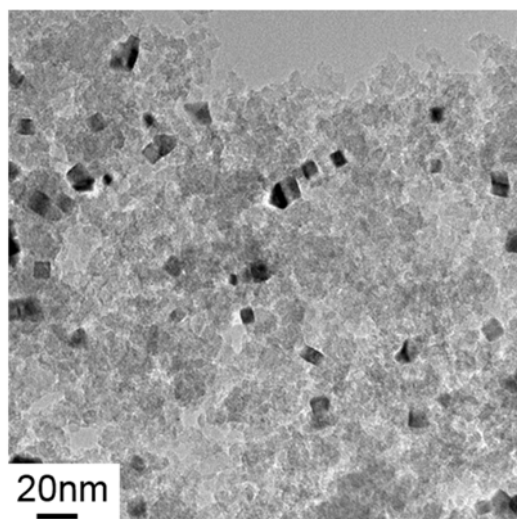

**Figure S7.** TEM image of platinum nanocubes directly overgrown onto fumed silica. Fumed silica 50 mg, Pt(acac)<sub>2</sub> 12 mg, and MPTMS 5  $\mu$ l were used for the synthesis.

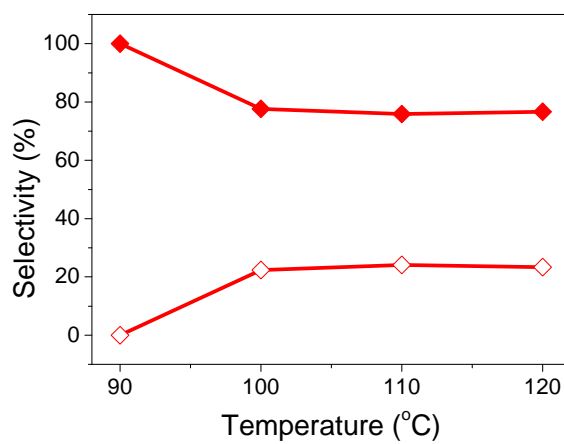

**Figure S8.** Selectivity for pyrrole hydrogenation of cubic Pt/fumed silica at different temperatures. ◆ pyrrolidine; ◇ butylamine.

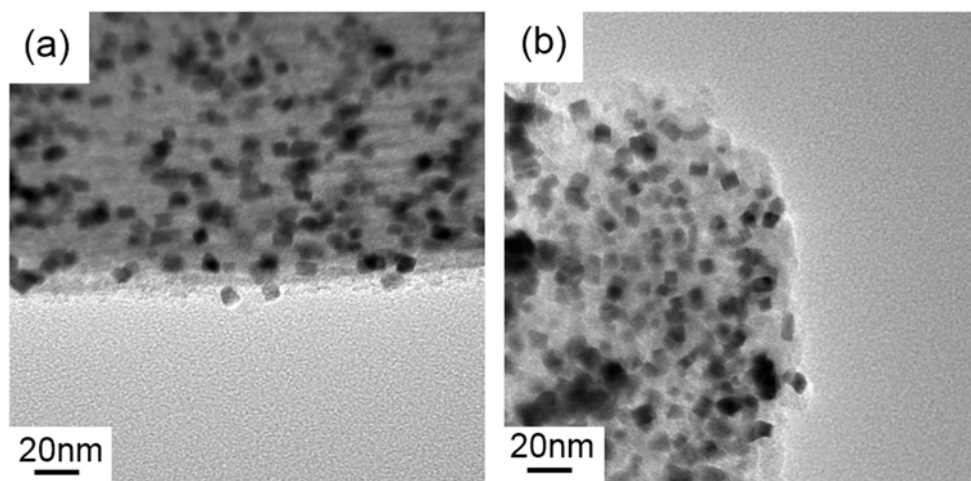

**Figure S9.** TEM images of the samples after pyrrole hydrogenation; (a) cubic Pt/SBA-15 and (b) cubic Pt/SBA-16.
